# Supplementary material for: Systematic investigation of metal dopants and mechanism for the SnO2 electron transport layer in perovskite solar cells
Source: Royal Society of Chemistry journal article supplement (doi:10.1039/d2cp01475k), 2023-01-01
Supplement: d2cp01475k1.pdf [file d2cp01475k1.pdf]

# Supporting Information

## Systematical Investigation of Metal Dopants and Mechanism for SnO<sub>2</sub> Electron Transport Layer in Perovskite Solar Cells

Liguo Gao<sup>1,\*</sup>, Zhen He<sup>1</sup>, Cai Xu<sup>1</sup>, Yingjie Su<sup>1</sup>, Jingjing Hu<sup>1</sup>, Tingli Ma<sup>2,3</sup>

<sup>1</sup> State Key Laboratory of Fine Chemicals, Dalian University of Technology, Panjin, 124221, P. R. of China.

<sup>2</sup> College of Materials and Chemistry, China Jiliang University, Hangzhou, 310018, P. R. China.

<sup>3</sup> Graduate School of Life Science and Systems Engineering, Kyushu Institute of Technology, Kitakyushu, Fukuoka 808-0196, Japan.

### Corresponding Author

\*Liguo.Gao

E-mail: liguo.gao@dlut.edu.cn; ORCID: 0000-000253903663.

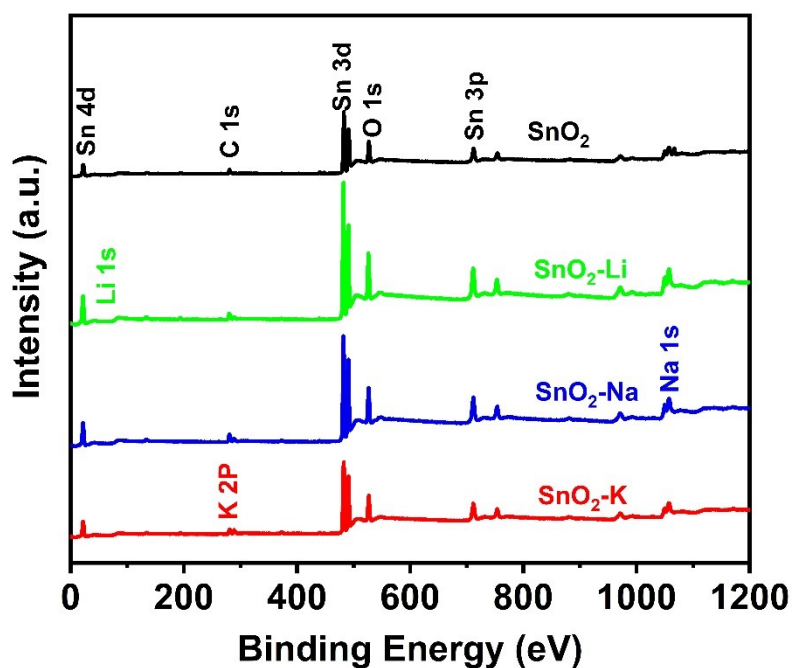

**Figure S1** The whole XPS spectra of SnO<sub>2</sub> and SnO<sub>2</sub> with different dopants including Li, Na, K.

**Table S1** XRD parameters: full width at half maxima (FWHM) of SnO<sub>2</sub> and SnO<sub>2</sub> with different dopants including Li, Na, K.

| Samples              | FWHM<br>(110/25.6°) | FWHM<br>(220/51.2°) |
|----------------------|---------------------|---------------------|
| SnO <sub>2</sub>     | 0.211               | 0.269               |
| SnO <sub>2</sub> -Li | 0.156               | 0.216               |
| SnO <sub>2</sub> -Na | 0.123               | 0.200               |
| SnO <sub>2</sub> -K  | 0.106               | 0.124               |

**Table S2** XRD parameters: FWHM of the perovskite films on SnO<sub>2</sub> and SnO<sub>2</sub> with different dopants including Li, Na, K.

| Samples              | FWHM<br>(110/13.4°) | FWHM<br>(310/31.2°) |
|----------------------|---------------------|---------------------|
| SnO <sub>2</sub>     | 0.235               | 0.213               |
| SnO <sub>2</sub> -Li | 0.218               | 0.201               |
| SnO <sub>2</sub> -Na | 0.189               | 0.174               |
| SnO <sub>2</sub> -K  | 0.164               | 0.153               |

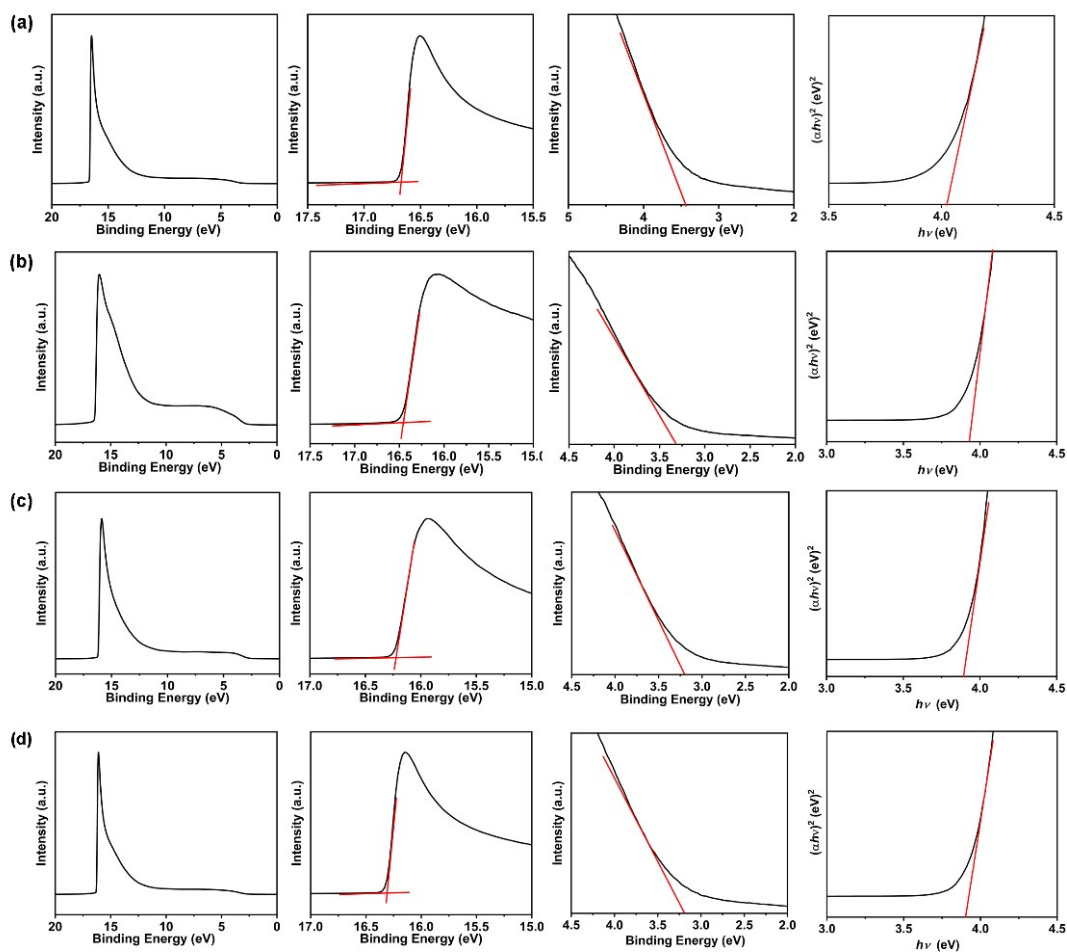

**Figure S2** (a) SnO<sub>2</sub> (b) SnO<sub>2</sub>-Li (c) SnO<sub>2</sub>-Na (d) SnO<sub>2</sub>-K. For all the Figure captions a-d, the first images were the whole UPS spectra, the second images were the secondary-electron cut-off, the third images were the valence band region, the fourth images were the Tauc plot curve.

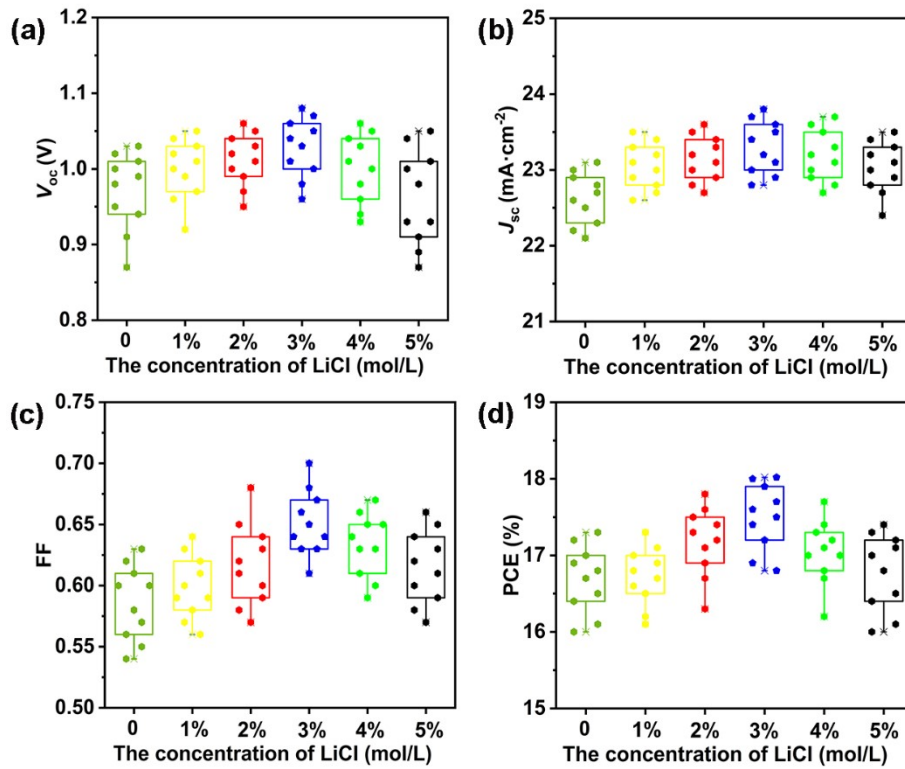

**Figure S3** Photovoltaic parameters ( $V_{oc}$ ,  $J_{sc}$ , FF, and PCE) of PSCs at various concentration of LiCl.

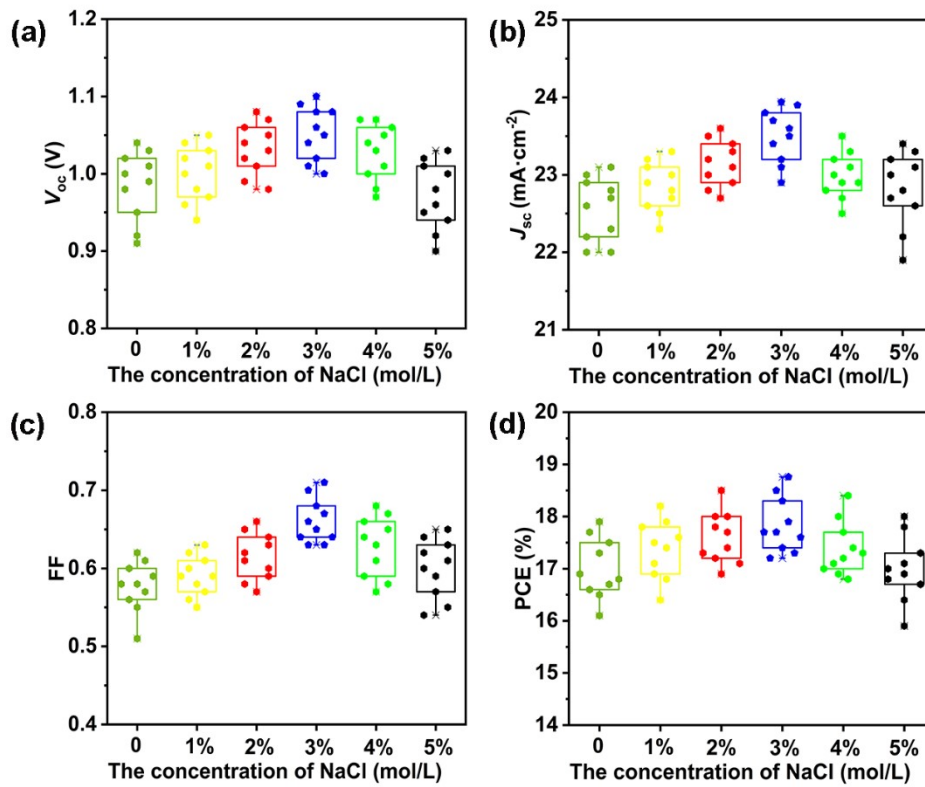

**Figure S4** Photovoltaic parameters ( $V_{oc}$ ,  $J_{sc}$ , FF, and PCE) of PSCs at various concentration of NaCl.

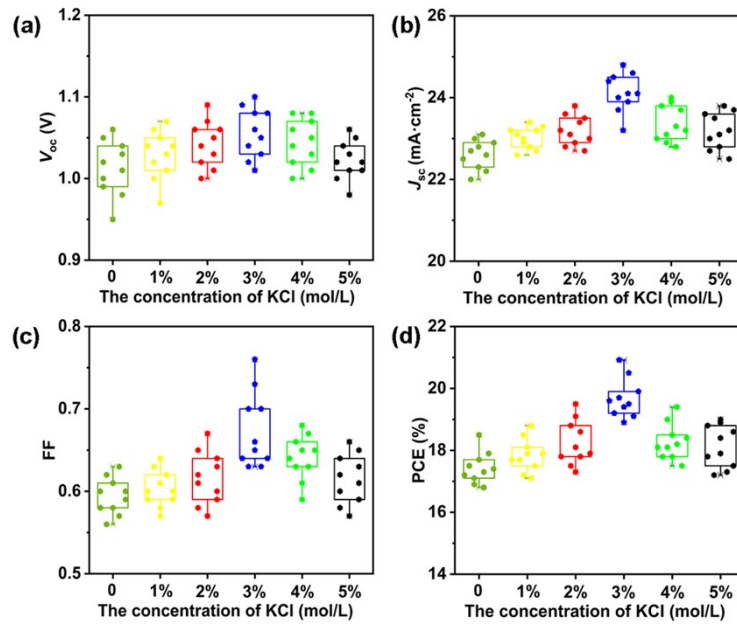

**Figure S5** Photovoltaic parameters ( $V_{oc}$ ,  $J_{sc}$ , FF, and PCE) of PSCs at various concentration of KCl.

**Table S3** The EIS details of PSCs based on different ETLs: SnO<sub>2</sub> and SnO<sub>2</sub> with different dopants including Li, Na, K.

| Samples              | $R_s/\Omega$ | $R_{tr}/\Omega$ | $R_{rec}/\Omega$ |
|----------------------|--------------|-----------------|------------------|
| SnO <sub>2</sub>     | 20.50        | 90.90           | 200.68           |
| SnO <sub>2</sub> -Li | 15.70        | 68.70           | 260.50           |
| SnO <sub>2</sub> -Na | 14.90        | 52.70           | 280.50           |
| SnO <sub>2</sub> -K  | 12.20        | 47.80           | 301.70           |

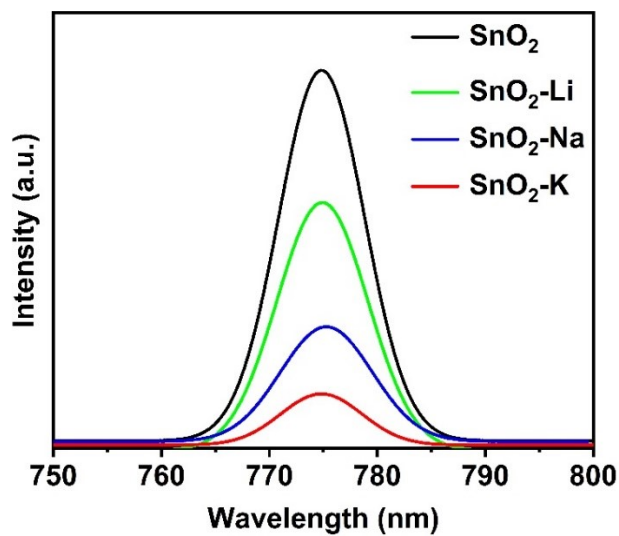

**Figure S6** PL spectra tested with FTO/SnO<sub>2</sub>/perovskite or FTO/SnO<sub>2</sub>-Li, Na, K/perovskite.

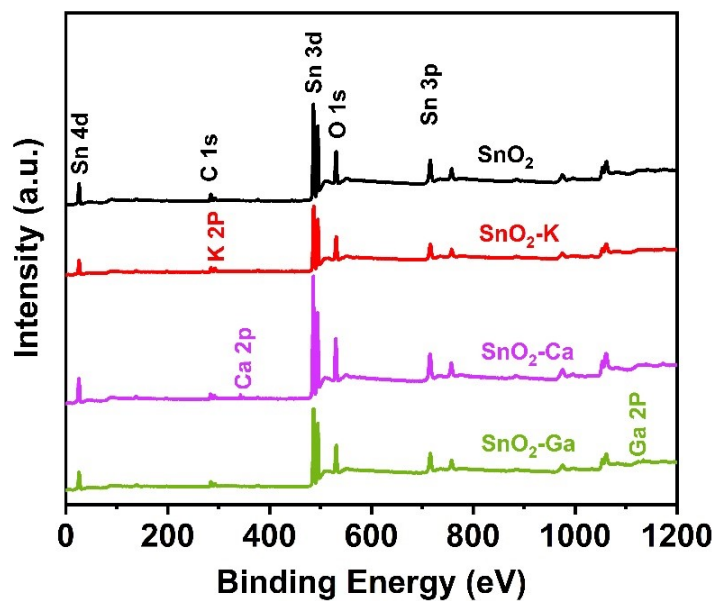

**Figure S7** The whole XPS spectra of SnO<sub>2</sub> and SnO<sub>2</sub> with different dopants including K, Ca, Ga.

**Table S4** XRD parameters: FWHM of SnO<sub>2</sub> with different dopants including K, Ca, Ga.

| Samples              | FWHM<br>(110/25.6°) | FWHM<br>(220/51.2°) |
|----------------------|---------------------|---------------------|
| SnO <sub>2</sub> -K  | 0.106               | 0.124               |
| SnO <sub>2</sub> -Ca | 0.166               | 0.234               |
| SnO <sub>2</sub> -Ga | 0.209               | 0.264               |

**Table S5** XRD parameters: FWHM of the perovskite films on SnO<sub>2</sub> with different dopants including K, Ca, Ga.

| Samples              | FWHM<br>(110/13.4°) | FWHM<br>(310/31.2°) |
|----------------------|---------------------|---------------------|
| SnO <sub>2</sub> -K  | 0.164               | 0.153               |
| SnO <sub>2</sub> -Ca | 0.227               | 0.208               |
| SnO <sub>2</sub> -Ga | 0.230               | 0.210               |

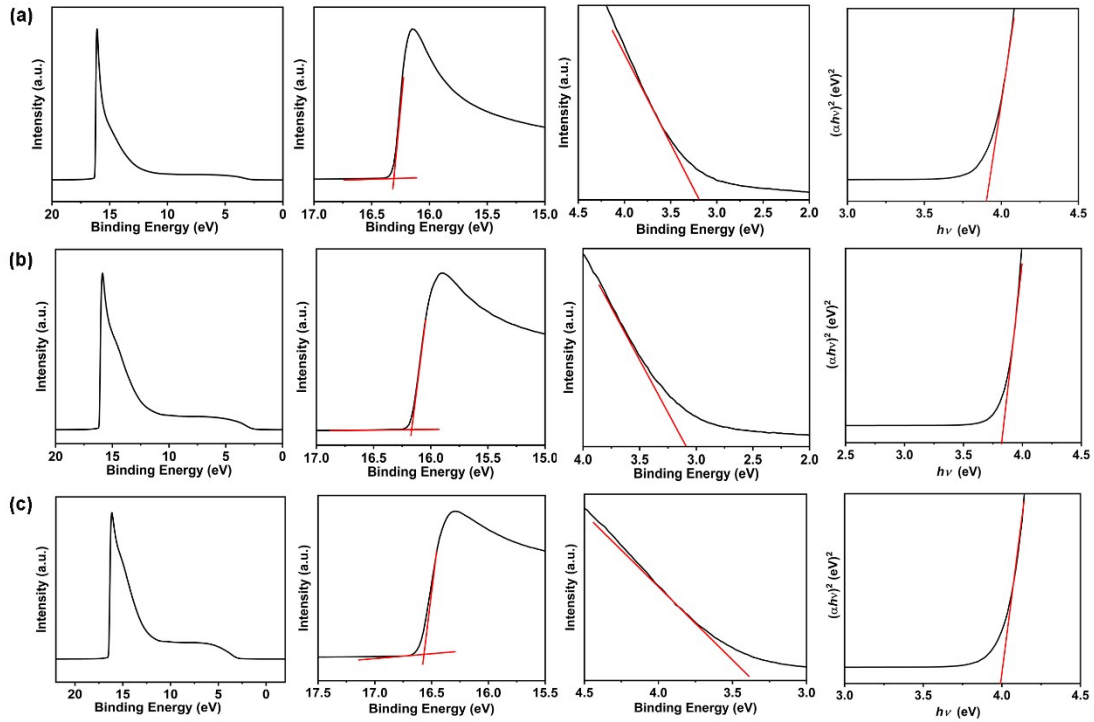

**Figure S8** (a) SnO<sub>2</sub>-K (b) SnO<sub>2</sub>-Ca (c) SnO<sub>2</sub>-Ga. For all the Figure captions a-d, the first images were the whole UPS spectra, the second images were the secondary-electron cut-off, the third images were the valence band region, the fourth images were the Tauc plot curve.

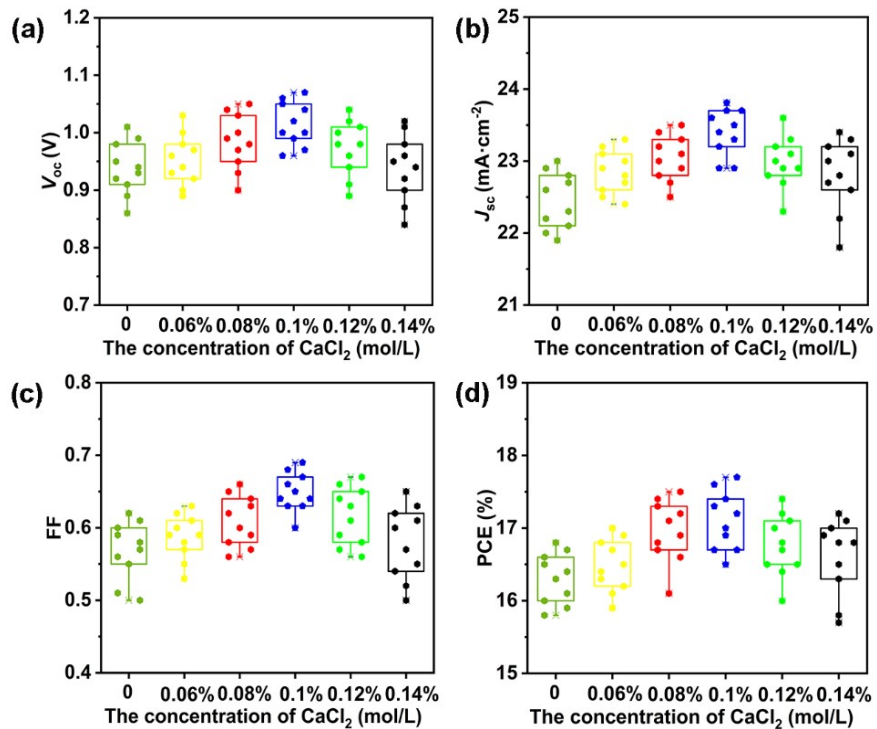

**Figure S9** Photovoltaic parameters ( $V_{oc}$ ,  $J_{sc}$ , FF, and PCE) of PSCs at various concentration of CaCl<sub>2</sub>.

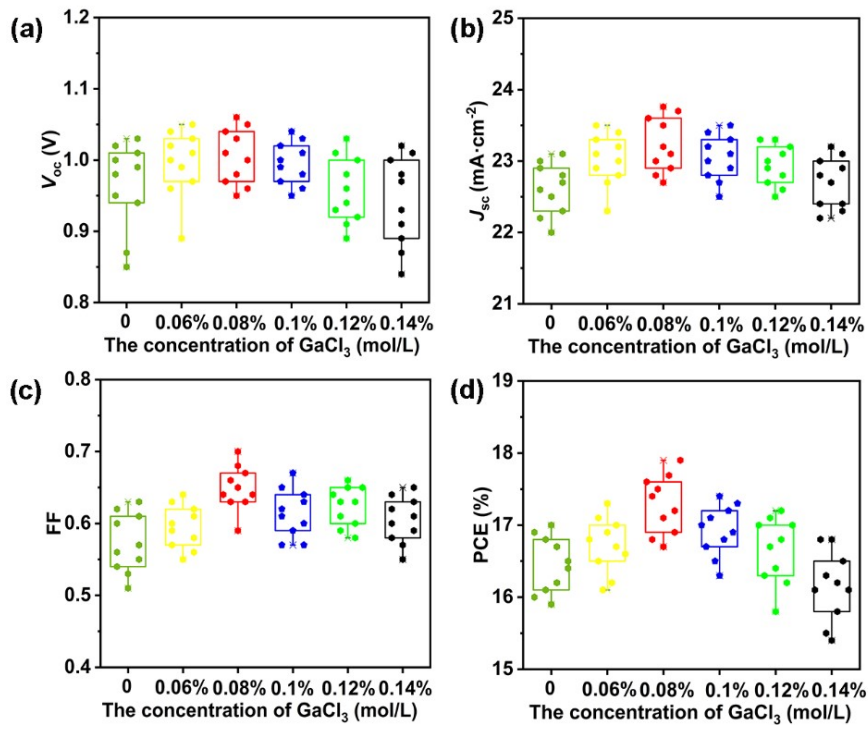

**Figure S10** Photovoltaic parameters ( $V_{oc}$ ,  $J_{sc}$ , FF, and PCE) of PSCs at various concentration of GaCl<sub>3</sub>.

**Table S6** The EIS details of PSCs based on different ETLs: SnO<sub>2</sub> and SnO<sub>2</sub> with different dopants including K, Ca, Ga.

| Samples              | $R_s/\Omega$ | $R_{tr}/\Omega$ | $R_{rec}/\Omega$ |
|----------------------|--------------|-----------------|------------------|
| SnO <sub>2</sub> -K  | 12.2         | 47.8            | 301.7            |
| SnO <sub>2</sub> -Ca | 16.3         | 75.6            | 244.6            |
| SnO <sub>2</sub> -Ga | 18.5         | 81.9            | 224.6            |



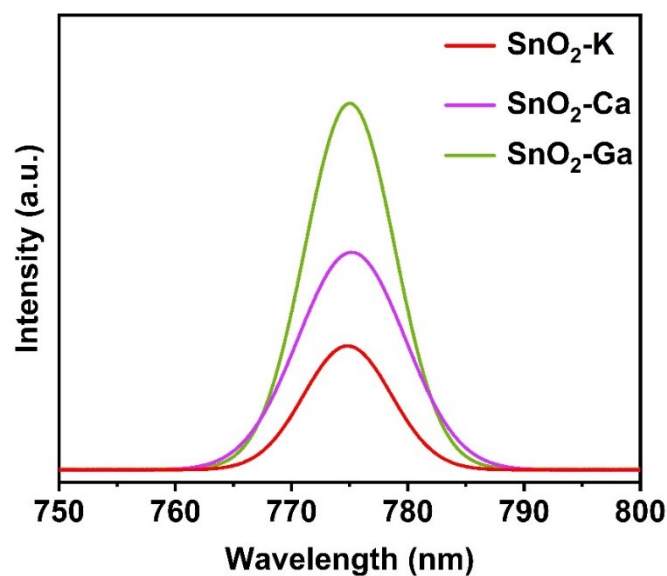

**Figure S11** PL spectra tested with FTO/SnO<sub>2</sub>/perovskite or FTO/SnO<sub>2</sub>-K, Ca, Ga/perovskite.

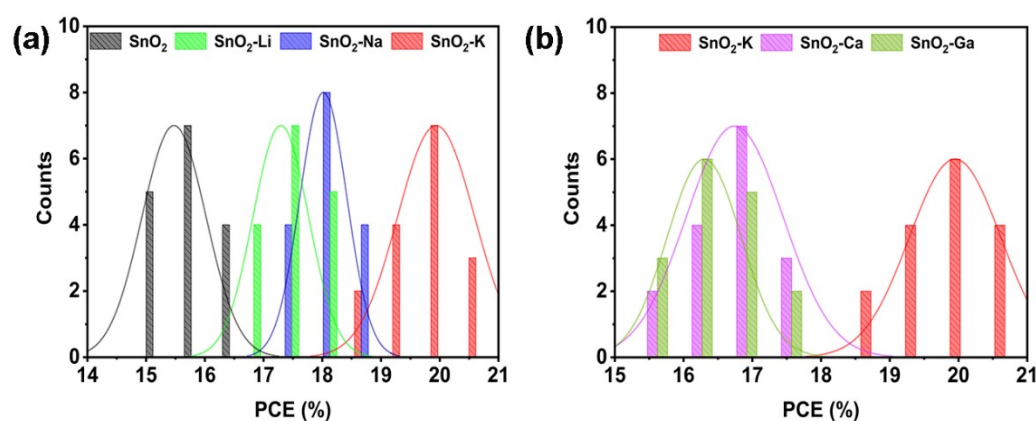

**Figure S12** Reproducibility of 16 samples with (a) SnO<sub>2</sub> and SnO<sub>2</sub> with different dopants including Li, Na, K; (b) SnO<sub>2</sub> and SnO<sub>2</sub> with different dopants including K, Ca, Ga.

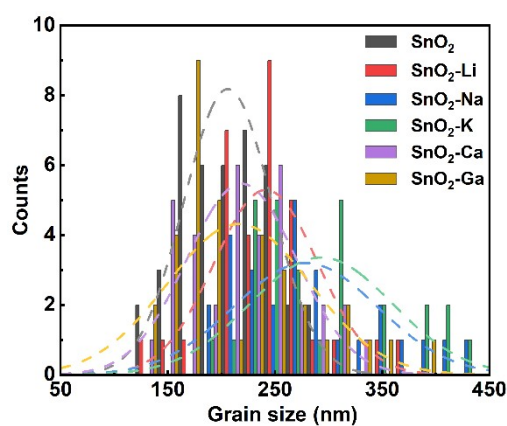

**Figure S13** Statistical data of the grain size of the perovskite films based on different SnO<sub>2</sub> films.
